# Supplementary material
Source: HighWire-hosted journal article supplement (https://www.annfammed.org/highwire/filestream/8629/field_highwire_adjunct_files/0/Rosener_Supp_Apps_1-4.pdf)
Supplement: Rosener_Supp_Apps_1-4.pdf [file Rosener_Supp_Apps_1-4.pdf]

**Supplemental materials for:**

Rosener SE, Barr WB, Frayne DJ, Barash JH, Gross ME, Bennett IM. Interconception care for mothers during well-child visits with family physicians: an IMPLICIT network study. *Ann Fam Med*. 2016;14(4):350-354.

APPENDIX 1 – Distribution of site survey completion (location, affiliation, brief descriptions)

| <b>Institution</b>         | <b>Location</b>  | <b>Affiliation</b>                                                | <b>Sample Size</b> |
|----------------------------|------------------|-------------------------------------------------------------------|--------------------|
| Beth Israel                | New York, NY     | Community-based, University affiliated                            | 15                 |
| Ellis Hospital             | Schenectady, NY  | Community-based, University affiliated                            | 55                 |
| Lancaster General          | Lancaster, PA    | Community-based, University affiliated                            | 72                 |
| Greater Lawrence           | Lawrence, MA     | Community-based, University affiliated,<br>Teaching Health Center | 59                 |
| MAHEC                      | Asheville, NC    | Community-based, University affiliated                            | 108                |
| Middlesex Hospital         | Middletown, CT   | Community-based, University affiliated                            | 65                 |
| Reading Hospital           | Reading, PA      | Community-based, University affiliated                            | 9                  |
| Thomas Jefferson           | Philadelphia, PA | University-based                                                  | 49                 |
| University of Pennsylvania | Philadelphia, PA | University-based                                                  | 88                 |
| UPMC-Shadyside             | Pittsburgh, PA   | University administered, Community-based                          | 50                 |
| UPMC – St. Margaret        | Pittsburgh, PA   | University administered, Community-based                          | 51                 |
| Williamsport Hospital      | Williamsport, PA | Community-based, University affiliated                            | 37                 |

## APPENDIX 2 – IMPLICIT Network Site Locations

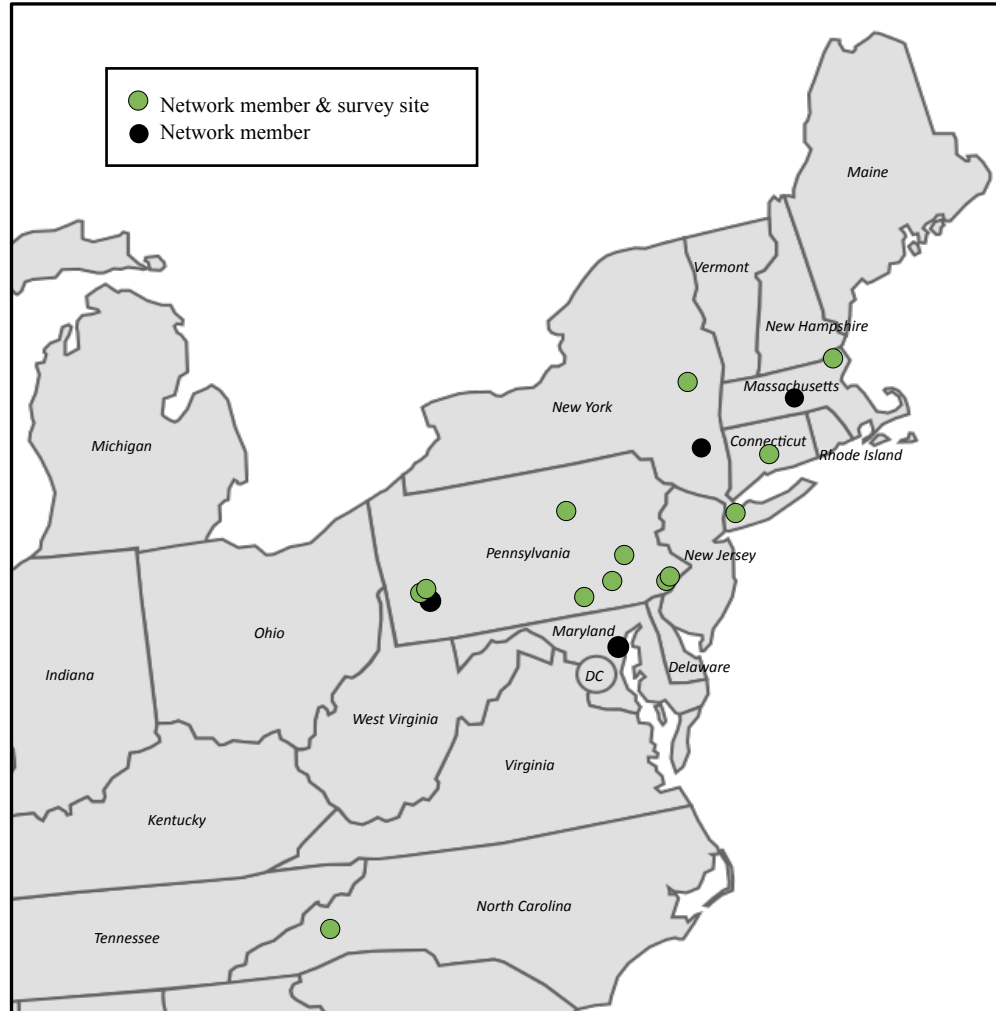

Note: Distances are approximate

This supplemental material has been supplied by the author and has not been edited by Annals of Family Medicine

APPENDIX 3 – Survey Instruments in English.

**Mother’s Health Care Needs During Well Child Visits Survey**

Your health center wants to find out how they can improve the health of mothers who bring their children in for well child visits. We are studying how doctors care for the mothers who bring their babies to the health center and how mothers feel about this care.

This is an anonymous survey about yourself, your health care, and how you feel about your baby’s doctor asking about your health. We will not use your name or any other information that can identify you on this survey. The survey should take about 5-10 minutes.

This survey is voluntary. You do not have to answer any questions if you do not want to. If you choose not to take the survey, your health care and the health care of your baby will not be affected in any way. If you have any questions about the survey please feel free to call the Institutional Review Board at \_\_\_\_\_.

If you agree to take the survey, please move to Question #1.

This survey will ask you questions about your health (not your child’s) since the birth of your child that is seeing the doctor today.

**1. Why did you bring your child to the doctor today?**

- a. 12 month check up
- b. 24 month check up

**2. Your Age: \_\_\_\_\_**

**3. How would you describe your race?**

- a. White
- b. Black or African American
- c. American Native
- d. Asian
- e. Native Hawaiian or Other Pacific Islander
- f. Other or Unknown

**4. Are you Hispanic?**

- a. Yes
- b. No

**5. What type of health insurance do you have for yourself?**

This supplemental material has been supplied by the author and has not been edited by *Annals of Family Medicine*.

- a. Government supported (Medicaid, Medicare, Family Health Plus, Medical Assistance, etc.)
- b. Private insurance or insurance offered by your employer
- c. No insurance (self-pay)

**6. Did you get pregnancy care from your child’s doctor?**

- a. Yes
- b. No

**7. Do you and your child use the same doctor’s office?**

- a. Yes
- b. No

**8. Were any of your children born early (1 month or more before your due date)?**

- a. Yes
- b. No

**9. Do you have any of the following medical problems?**

|                                                                  |     |    |
|------------------------------------------------------------------|-----|----|
| Diabetes (high blood sugar)                                      | Yes | No |
| Hypertension (high blood pressure)                               | Yes | No |
| Seizures (Epilepsy)                                              | Yes | No |
| Depression                                                       | Yes | No |
| Other mental health issues (ex: anxiety, bipolar, schizophrenia) | Yes | No |

**10. Do you take any of the following medications?**

|                          |     |    |
|--------------------------|-----|----|
| carbamazepine (Tegretol) | Yes | No |
| valproic acid (Depakote) | Yes | No |

**11. Are you currently taking any of the following vitamins (choose all those you are taking)?**

This supplemental material has been supplied by the author and has not been edited by *Annals of Family Medicine*.

- a. Multi-vitamin
- b. Prenatal vitamin
- c. Folic acid
- d. None

**12. Since the birth of the child being seen today (circle all that are true):**

- a. My child's doctor talked to me about the benefits of taking folic acid
- b. My child's doctor recommended I take folic acid (dose if known \_\_\_\_\_)
- c. My child's doctor recommended I take a daily multi-vitamin
- d. My child's doctor recommended I take a daily Prenatal Vitamin
- e. None of the above

**13. What are your tobacco smoking habits?**

- a. I have never smoked or have smoked fewer than 100 cigarettes in my lifetime
- b. I quit smoking in the past and am not smoking now
- c. I quit in the past but am now smoking again
- d. I am smoking and have never quit

**14. If you have smoked since your child's birth (circle all that are true):**

- a. My child's doctor recommended that I quit smoking
- b. My child's doctor gave me information about how to quit smoking
- c. My child's doctor referred me to another doctor or program to help me quit
- d. None of the above

**15. Did a doctor ask you if you felt depressed at any of your child's check-ups?**

- a. Yes
- b. No

**16. Has any doctor ever told you that you have depression?**

- a. Yes
- b. No

**17. Has any doctor told you that you have depression since this child was born?**

- a. No
- b. Yes - circle all that are true:
  - i. The doctor referred me to another doctor for treatment
  - ii. The doctor referred me to a counselor or therapist
  - iii. Someone in the doctor's office helped me make an appointment to treat my depression
  - iv. The doctor offered treatment at my baby's appointment

**18. How many times have you given birth? Please give month and year of all deliveries:**

(1)\_\_\_\_\_ (2)\_\_\_\_\_ (3)\_\_\_\_\_

(4)\_\_\_\_\_ (5)\_\_\_\_\_ (6)\_\_\_\_\_

**19. Are you pregnant now?**

- a. Yes: When is your baby due? Month and Year:\_\_\_\_\_
- b. No

**20. If you are not pregnant now, have you been pregnant since the birth of the child seeing the doctor today?**

- a. Yes
- b. No

**21. If you are not pregnant, how would you feel about becoming pregnant again right now?**

- a. I don't want to become pregnant again right now
- b. I would not mind becoming pregnant again now
- c. I want to become pregnant again now

**22. If you are not pregnant, are you using something to prevent pregnancy now?**

- a. No
- b. Yes - circle all methods used:
  - i. Birth Control Pills
  - ii. Patch or Ring
  - iii. Depo-Provera (“the shot”)
  - iv. IUD (Paragard or Mirena – device placed in the uterus)
  - v. Implant (Implanon – small plastic rod under the skin of your arm)
  - vi. Condoms (“rubbers”) or Diaphragm
  - vii. Emergency contraception pill (Plan B)
  - viii. Rhythm method, Natural Family Planning or Withdrawal method
  - ix. I has my tubes tied or my partner had a vasectomy
  - x. I’m not having sex with men (abstinence)
  - xi. Other: \_\_\_\_\_

**23. This question is about how long to wait between pregnancies. (Circle all that are true):**

- a. My child’s doctor talked to me about why it is important to wait more than a year
- b. My child’s doctor asked if I was using birth control
- c. My child’s doctor gave me information about birth control
- d. My child’s doctor offered me referral or an appointment so I could get started on birth control

**24. I believe that my health affects the health of my children and children from future pregnancies.**

- a. True
- b. False

**25. I am willing to take advice about my health that affects my children from my child’s doctor.**

- a. Yes
- b. No



APPENDIX 4 – Survey Instruments in Spanish.

**Encuesta Sobre las Necesidades de Salud de Las Madres Durante Las Visitas de Control Para  
Sus Hijo**

Los profesionales de su centro de salud buscan saber cómo pueden mejorar la salud de las madres que traen a sus hijos para visitas médicas de control. Estamos estudiando cómo los doctores cuidan la salud de las madres que traen sus bebés al centro de salud y cómo las madres se sienten de este cuidado médico.

Es una encuesta anónima sobre usted, su cuidado médico y cómo se siente cuando el doctor de su niño le pregunta sobre su salud. No utilizaremos su nombre ni otro tipo de datos personales que puedan identificarla en la encuesta. La encuesta toma de 5 a 10 minutos.

Esta encuesta es voluntaria. Usted no tiene obligación de contestar ninguna pregunta si no lo desea. Si usted decide no completar la encuesta, su cuidado de la salud y el cuidado de su niño no serán afectados de ninguna manera. Si tiene cualquier pregunta sobre la encuesta, por favor llame a la Junta de Evaluación Institucional (Institutional Review Board) al \_\_\_\_\_.

Si usted acepta participar, por favor comience con la pregunta N° 1.

En esta encuesta hay preguntas sobre su salud (no la salud de su niño) desde que nació el niño que tiene la cita de hoy.

**1. ¿Por qué trajo el niño/a al doctor hoy?**

- a. Chequeo de los 12 meses
- b. Chequeo de los 24 meses

**2. Su edad:** \_\_\_\_\_

**3. ¿Cómo describiría a su raza?**

- a. Blanca
- b. Negra o afro-americana
- c. Americana nativa
- d. Asiática
- e. Hawaiana nativa o nativa de otra isla del Pacífico
- f. Otra o no lo sé

**4. ¿Es hispana?**

- a. Sí
- b. No

**5. ¿Qué tipo de seguro médico tiene para usted misma?**

- a. Seguro del gobierno (Medicaid, Medicare, Family Health Plus, Medical Assistance, etc.)
- b. Seguro privado o seguro que ofrece su empleador
- c. No tengo seguro (pago yo misma)

**6. ¿Recibió cuidado médico durante su embarazo del doctor de su niño?**

- a. Sí
- b. No

**7. ¿Usted y su niño reciben cuidado médico del mismo consultorio?**

- a. Sí
- b. No

**8. ¿Nació alguno de sus hijos antes de tiempo (1 mes o más antes de la fecha que tenían que nacer)?**

- a. Sí
- b. No

**9. ¿Tiene alguno de los siguientes problemas de salud?**

|                                                                                           |    |    |
|-------------------------------------------------------------------------------------------|----|----|
| Diabetes (alto nivel de azúcar en la sangre)                                              | Sí | No |
| Hipertensión (presión alta)                                                               | Sí | No |
| Convulsiones (epilepsia)                                                                  | Sí | No |
| Depresión                                                                                 | Sí | No |
| Otros problemas de salud mental (por ejemplo: ansiedad, trastorno bipolar, esquizofrenia) | Sí | No |

**10. ¿Toma algunos de los siguientes medicamentos?**

|                          |    |    |
|--------------------------|----|----|
| carbamazepine (Tegretol) | Sí | No |
| valproic acid (Depakote) | Sí | No |

**11. ¿Está tomando algunas de las siguientes vitaminas? (Por favor marque todas las que esté tomando.)**

- a. Multi-vitamina
- b. Vitamina prenatal
- c. Ácido fólico
- d. Ninguna

**12. Desde que nació el niño que tiene la cita con el doctor hoy, (marque todas las respuestas que correspondan):**

- a. El doctor de mi niño habló conmigo acerca de los beneficios del ácido fólico
- b. El doctor de mi niño me recomendó que tomara ácido fólico (dosis, si la sabe: \_\_\_\_\_)
- c. El doctor de mi niño me recomendó que tomara una multi-vitamina todos los días
- d. El doctor de mi niño me recomendó que tomara una vitamina prenatal todos los días
- e. Ninguna de estas respuestas

**13. ¿Cuáles son sus hábitos en cuanto al consumo de tabaco?**

- a. Nunca he fumado o he fumado menos de 100 cigarrillos en mi vida
- b. Dejé de fumar en el pasado y ahora ya no fumo
- c. Dejé de fumar en el pasado pero ahora estoy fumando otra vez
- d. Fumo y nunca dejé de fumar

**14. Si usted ha fumado desde que nació su niño, (marque todas las respuestas que correspondan):**

- a. El doctor de mi niño me recomendó que dejara de fumar
- b. El doctor de mi niño me dio información sobre cómo dejar de fumar
- c. El doctor de mi niño me derivó a otro doctor o programa para que deje de fumar
- d. Ninguna de estas respuestas

**15. ¿Le preguntó el doctor si se sentía deprimida durante algunas de las citas de su niño?**

- a. Sí
- b. No

**16. ¿Le dijo un doctor alguna vez que usted padece de depresión?**

- a. Sí
- b. No

**17. Desde que nació este niño, ¿le informó algún doctor que padece de depresión?**

- a. No
- b. Sí - marque las respuestas que correspondan:
  - i. El doctor me derivó a otro doctor para ser tratada
  - ii. El doctor me derivó a un consejero o terapeuta
  - iii. Alguien de la clínica del doctor me ayudó a hacer una cita para tratar mi depresión.
  - iv. El doctor me ofreció tratamiento durante la cita de mi bebé.

**18. ¿Cuántas veces dio a luz? Por favor escriba el mes y el año de todos los partos:**

(1) \_\_\_\_\_ (2) \_\_\_\_\_ (3) \_\_\_\_\_  
(4) \_\_\_\_\_ (5) \_\_\_\_\_ (6) \_\_\_\_\_

**19. ¿Está embarazada ahora?**

- a. Sí: ¿Cuándo se espera que nazca su bebé? Mes y año: \_\_\_\_\_
- b. No

**20. Si no está embarazada hoy, ¿ha estado embarazada desde que nació el niño que tiene la cita hoy?**

- a. Sí
- b. No

**21. Si no está embarazada ahora, ¿cómo se siente de la posibilidad de quedar embarazada ahora?**

- a. No quiero quedarme embarazada ahora
- b. No me molestaría quedar embarazada ahora
- c. Deseo quedarme embarazada

**22. Si usted no está embarazada, ¿está usando algo para prevenir el embarazo?**

- a. No
- b. Sí – marque todos los métodos que esté usando:
  - i. Pastillas anticonceptivas
  - ii. Parche o anillo vaginal
  - iii. Depo-Provera (“la inyección”)
  - iv. DIU (Paragard o Mirena – aparato que se coloca en la matriz)
  - v. Implante (Implanon – barrita de plástico que se coloca debajo de la piel del brazo)
  - vi. Condones o diafragma
  - vii. Pastillas anticonceptivas de emergencia (Plan B)
  - viii. Método natural o retiro del pene antes de eyacular
  - ix. Me ataron las trompas o mi pareja tuvo la cirugía (vasectomía)
  - x. No tengo relaciones con hombres (abstinencia)
  - xi. Otro: \_\_\_\_\_

**23. Esta pregunta se trata del tiempo que se debe esperar entre embarazo y embarazo: (marque todas las que correspondan):**

- a. El doctor de mi niño me explicó la importancia de esperar más de un año antes de quedar embarazada otra vez.
- b. El doctor de mi niño me preguntó si estaba usando métodos anticonceptivos
- c. El doctor de mi niño me dio información sobre el control de la natalidad
- d. El doctor de mi niño me ofreció un “referido” o una cita para que yo pueda comenzar a tomar anticonceptivos

**24. Yo creo que mi salud afecta la salud de mis hijos y la salud de los hijos que pueda tener en el futuro.**

- a. Verdadero
- b. Falso

**25. Acepto los consejos médicos sobre mi salud que puede ofrecer el doctor de mi niño.**

- a. Sí
- b. No
